# Supplementary material for: Metal Tolerance Protein Encoding Gene Family in Fagopyrum tartaricum: Genome-Wide Identification, Characterization and Expression under Multiple Metal Stresses
Source: Plants (Basel). 2022 Mar 23;11(7):850. doi: 10.3390/plants11070850 (PMC9003181; doi:10.3390/plants11070850)
Supplement: Supplementary file 1 [file plants-11-00850-s001.zip]

Archive with 4 entries (4 files):
- Supplemental Table S1.xlsx
- Supplemental Table S2.xlsx
- Supplemental Table S3.xlsx
- Supplementary Figure S1 .pdf
