# Supplementary material for: Metal Tolerance Protein Encoding Gene Family in Fagopyrum tartaricum: Genome-Wide Identification, Characterization and Expression under Multiple Metal Stresses
Source: Plants (Basel). 2022 Mar 23;11(7):850. doi: 10.3390/plants11070850 (PMC9003181; doi:10.3390/plants11070850)
Supplement: Supplementary file 1 [file plants-11-00850-s001.zip › Supplemental Table S1.xlsx]

## Sheet: Table S1
Table S1 Protein sequences of 55 MTPs used in this study
Species	Gene name	Gene ID	Protein sequences
Arabidopsis thaliana	AtMTP1	At2g46800	MESSSPHHSHIVEVNVGKSDEERIIVASKVCGEAPCGFSDSKNASGDAHERSASMRKLCIAVVLCLVFMSVEVVGGIKANSLAILTDAAHLLSDVAAFAISLFSLWAAGWEATPRQTYGFFRIEILGALVSIQLIWLLTGILVYEAIIRIVTETSEVNGFLMFLVAAFGLVVNIIMAVLLGHDHGHSHGHGHGHGHDHHNHSHGVTVTTHHHHHDHEHGHSHGHGEDKHHAHGDVTEQLLDKSKTQVAAKEKRKRNINLQGAYLHVLGDSIQSVGVMIGGAIIWYNPEWKIVDLICTLAFSVIVLGTTINMIRNILEVLMESTPREIDATKLEKGLLEMEEVVAVHELHIWAITVGKVLLACHVNIRPEADADMVLNKVIDYIRREYNISHVTIQIER
	AtMTP2	At3g61940	MDSRRSKVCGETACGFSTSSSDAKKRAASMRKLCFVVVLCLLFMSIEVVCGIKANSLAILADAAHLLTDVGAFAISMLSLWASSWEANPRQSYGFFRIEILGTLVSIQLIWLLTGILVYEAVTRLVQETNDDVDGFFMVLVAAFGLVVNIIMIVVLGHDHGHGHDHGHSHDHGHSYGERAEQLLEKSKEIRNINVQGAYLHVLGDLIQSIGVMIGGGMIWYNPKWKVIDLICTLFFSVIVLGTTIKMLRSILEVLMESTPREIDARQLEKGLMEIEEVVDVHELHIWAITVGKALFSCHVKVRPEAGDEMVLNKVIDYIWREYRISHVTIQIER
	AtMTP3	At3g58810	MVTPKLHLDLSLTKKVSYLFVSRQTLYRLSSSCLASLFLSFDAFLIARSCFFFQMKDHIHEHDHMVQICGEVSSGETSLVGIKKTCGEAPCGFSDAKTSSIEAQERAASMRKLLIAVLLCAIFIVVEVVGGIKANSLAILTDAAHLLSDVAAFAISLFSLWASGWKANPQQSYGFFRIEILGALVSIQMIWLLAGILVYEAIVRLNNGSGEVEGSLMFAVSAVGLLVNIAMAILLGHDHGHGHGHSHDNGHGHSHDHGHGIAATEHHHDSGHDESQLSDVLIEQKKQRNVNIQGAYLHVLGDSIQSVGVMIGGAIIWYKPEWKILDLICTLVFSVIVLGTTIGMLRNILEVLMESTPREIDPTMLEKGVCEIEEVVAVHELHIWAITVGKLLLACHVKI…
	AtMTP4	At2g29410	MELEQICILKPDDEEEMESPSPSKTEENLGVVPLSCAFTRQEHCVSETKEREESTRRLSSLIFLYLIVMSVQIVGGFKANSLAVMTDAAHLLSDVAGLCVSLLAIKVSSWEANPRNSFGFKRLEVLAAFLSVQLIWLVSGVIIHEAIQRLLSRSREVNGEIMFGISAFGFFMNLVMVLWLGHNHSHHHHDHHHHHHNHKHQHQHHHKEVVAEEEEEEMNPLKGEKSSSKEMNINIQGAYLHAMADMIQSLGVMIGGGIIWVKPKWVLVDLICTLVFSAFALAATLPILKNIFGILMERVPRDMDIEKLERGLKRIDGVKIVYDLHVWEITVGRIVLSCHILPEPGASPKEIITGVRNFCRKSYGIYHATVQVESE
	AtMTP5	At3g12100	MERSISFNPRGDNELPDDRSSDVGYAANDRRLAYSRSFQQSHGPRTPAVTEAAKPFLDRTVSSIDMPPDIYSVDGSDVFFGEGKDVDMAKVSVLEMVWEVFGVVTSGNRQMKRLFLLIALNVLYSTTELSIGIFTGRVGLVSDAFHLTFGCGLLTFSLFAMATSRKKPDHAYSYGYKRLEVLSAFTNALFLMFMSFSLAVEALHAFIQDESEHKHYLIVSAVTNLLVNLLGVWFFRNYARVNIAYRKAEDMNYHSVCLHVISDSIRSAGLILASWLLSLGVENAEVLCLGLVSVTVFMLVMPLFKATGGVLLQMAPPNIPSSALSKCLRQITSREDVTEVLQARFWEVVPGHTVGSLRLQVKSGIDERPLLQYVYDVYHDLGVQDLTLQTDYT
	AtMTP6	At2g47830	MGIIRFQILNPTRICRSTIYYMSCRYLPSSSSSSSPLRVSSSSSQKPSFDFSRRWHFGHPDHHQQYQKPGEEGEKIFRLGLTADIGLSVAKALTGYLCGSTAIIADAAHSVSDVVLSGVALVSYRAANVPKDKEHPYGHGKFETLGALGISAMLLATGSGIAWHALDLLSIALSAAPEVIHSGHHHGIDMNHPILALTVTIASISIKEGLYWITKRAGEKQGSGLMMANAWHHRSDAISSLVALVGVGGSILGVNFLDPLAGLVVSTMIVNAGLKTGHQSILELVDAAIPAQQLEPIRQTILQVEGVKGCHRLRGRRAGSSLYLDVHIVVDPFSSVSVAHEVGEYVRRQINLNHPEVSEVFIHIDPAFLQFSCSTKDHDSITKESNICQEIKHVEATVS…
	AtMTP7	At1g51610	MQSSHRILSRLLHSPRKGYIRASVGGSVHFLALFDEKDNGFVDTTHRSFSSLIRSSSHVRGLISTNCLNKGLGVRCSVSLDRETPLIDTYSSHRNFFTRAKQVKRIEINDQHSQRAVTTALWCNFLVFSLKFGVWWTSSSHVIMAEVVHSVADFANQALLAYGLSSSRRAPDALHPYGYSKERFVWSLISAVGIFCLGSGATIVNGVQNLWTSSPPPNMELAAVVIGGSFLIEGASLLVAIQSVKKGAAQEGMTIRDYIWRGHDPTSVAVMTEDGAAVAGLAIAAASLVAVRMTGNPIYDPIGSIVVGNLLGMVAIFLIQRNRHALIGRAMDDQDMSKVLKFLRNDSVVDSLYDCKSEVIGPGSFRFKAEIDFNGQMVVQNYLKRTGREEWAKMFREAA…
	AtMTP8	At3g58060	MEVNYCPETPLLSSNDHEAIDHKPKLTGMVSSMKSNFFADLPQKLRSKIDPENPLHLDVSKAAGLKEDEKEYYERQLATLKSFEEVESFLARSDEYTIDEKEEEEDRAERAAQELAMQISNWANIFLLALKIYATVKSGSIAIAASTLDSLLDLMAGGILWFTHLSMKNVNIYKYPIGKLRVQPVGIIIFAAVMATLGFQVLLVAAEQLISNEPSEKMNHVQLIWLYSIMLSATAIKLVLWIYCKSSRNHIVRAYAKDHHFDVVTNVLGLVAAVLANAFYWWLDPTGAILLAIYTIVNWSGTVMENAVSLIGQSAPPEVLQKLTYLVMRQGGDNIKHVDTVRAYTFGVLYFVEVDIELPEDLPLKEAHAIGESLQIKLEELPEVERAFVHLDFECHHKP…
	AtMTP9	At1g79520	MAATEHRGLSGGDYNVDLLPIDQDDSPPSSWRLSLDTFRLPSSSPLSSGRHNGRTRLSRYLRTPSKFLFLVLVLNLQKERKVSEYYKQQEKLLEGFNEMETINETGFVSGAPTEEELKKLAKSERLAVHISNAANLVLFVAKVYASVESRSMAVIASTLDSLLDLLSGFILWFTANAMRTPNNFRYPIGKRRMQPVGIIVFASVMATLGLQVILESTRLLVSKNGSHMSSTEEKWMIGIMASATVVKFLLMLYCRSFQNEIVRAYAQDHLFDVITNSVGLATAVLAVKFYWWIDPSGAILIALYTISTWARTVLENVHSLIGRSAPPDFLAKLTFLIWNHHEKIKHIDTVRAYTFGSHYFVEVDIVLPEDMRLHEAHNIGETLQEKLEQLSEVERAFVH…
	AtMTP10	At1g16310	MPLNSYIFFLFLTTSPRNTFFGIRTHSDRIMATEHITRTGDEYNVELLPSDDDAPPLESSWRLNLDAFQLPSSTGGRHDGRTRFSRYFRTPRKERRVSEYYKKQERLLEGFNEMETIHENGFASGVPTEEEMKKLAKSERLAVHISNATNLVLFVAKVYASMESRSMAVIASTLDSLLDLLSGFILWFTANAMRKPNQFHYPIGKRRMQPVGIIVFASVMATLGLQVLLESGRQLVAKSGIHMNSTEEKWMIGIMVSVTIVKFLLMLYCRGFQNEIVRAYAQDHLFDVVTNSIGLATAVLAVKFYWWIDPTGAILIALYTIATWARTVLENVHSLIGRSAPPDFLAKLTFLIWNHHEQIKHIDTVRAYTFGSHYFVEVDIVLPEDMRLQEAHNIGETLQ…
	AtMTP11	At2g39450	MVEPASPDSDEGISLLEFHGNGDRSWQLNFDDFQVSPEHKEKKSPSKLHNCLGCLGPEDNVADYYQQQVEMLEGFTEMDELAERGFVPGMSKEEQDNLAKSETLAIRISNIANMLLFAAKVYASVTSGSLAIIASTLDSLLDLLSGFILWFTAFSMQTPNPYQYPIGKKRMQPLGILVFASVMATLGLQIILESLRTMLSSHKEFNLTKEQESWVVGIMLSVTLVKLLLVLYCRSFTNEIVKAYAQDHFFDVITNIIGLIAVILANYIDYWIDPVGAIILALYTIRTWSMTVLENVNSLVGKSARPEYLQKLTYLCWNHHKAIRHIDTVRAYTFGSHYFVEVDIVLPADMPLQVAHDIGESLQEKLELLEEIERAFVHLDYEYTHKPEHARSHC
	AtMTP12	At2g04620	MVDHHHHHHHQHRPNRLSVPQPTIGRTYPSFPYTPTPTPSKTRLSSSSSYRSIHGSKSSLSFLFLILFSLRSLYSLLPFLRSSPSFSLFPFSFLVSLLSFLFSLSFTIISSFSPSKKDPFLLRLQNRSFSSISSLSSSQIKLLLAKSFLLAFVFLLRFQALRYCGAAAMILAELSGTVSARVLFSDTGGIGVRSSKVRGFCVLFAGLLLLSISWDRVDCFPFSSSVESWGFWIYPKENCLRIWPLLLPFLSGFLGCYEKVSVNWNEIKQLDQKRVRLLSLFLTTVLLFPLAIWSFFFSGSGDDSVSFGNLGWPLANTVVFGVLLSENYNDDKFSSSKKKDSEREFLVTFLCTIVLELFYFPELSLWGLLLCGLLLYIAVRELESVYSDYQEIGMESPES…
Oryza sativa	OsMTP1	Os05g03780	MDSHNSAPPQIAEVRMDISSSTSVAAGNKVCRGAACDFSDSSNSSKDARERMASMRKLIIAVILCIIFMAVEVVGGIKANSLAILTDAAHLLSDVAAFAISLFSLWAAGWEATPQQSYGFFRIEILGALVSIQLIWLLAGILVYEAIVRLINESGEVQGSLMFAVSAFGLFVNIIMAVLLGHDHGHGHGHGHGHGHSHDHDHGGSDHDHHHHEDQEHGHVHHHEDGHGNSITVNLHHHPGTGHHHHDAEEPLLKSDAGCDSTQSGAKDAKKARRNINVHSAYLHVLGDSIQSIGVMIGGAIIWYKPEWKIIDLICTLIFSVIVLFTTIKMLRNILEVLMESTPREIDATSLENGLRDMDGVVAVHELHIWAITVGKVLLACHVTITQDADADQMLDKVI…
	OsMTP5	Os02g58580	MLSISPLVVESSLSPCLPWLPPEPNLITSTPTGASLPQFTPLFFNLPLPLIHCCLYSAIKDWRSLLPLQMPQLFLLFLSFSLAVEALHAFMQDESEHKHYLIVSAVTNLLVNLLGVWFFRSYARVNIVYRKAEDMNYHSVCLHVLADSVRSAGLILASWFLSLGVENAEVLCLGIVSVAVFMLVLPLFKATGNILLQIAPGNVPPSALTKCFRQITACEDVSEVCQGRFWELVPGHAVGSLDIRVKNGGDCQSVLDYVHGLYQDLGIQDLTIQTDE
	OsMTP6	Os03g22550	MGFRLAHLAACVARAAASSSRLRGPRPAASALVAPLLASPWEPSGGGQPHWLVPSRGHVGHSHHHHHGEEVGGEASERIFRLGLAADVVLTVGKAVTGYLSGSTAIAADAAHSLSDIVLSGVALLSYKAAKAPRDKEHPYGHGKFESLGALGISSMLLVTAGGIAWHAFDVLQGVMSSAPDIIGNVSHAHHSHGSSGHHHGIDLEHPILALSVTAFAISVKEGLYWITKRAGEKEGSGLMKANAWHHRSDAISSVVALLGVGGSILGVPYLDPLAGLVVSGMILKAGVHTGYESVLELVDAAVDPSLLQPIKETILQVDGVKGCHRLRGRKAGTSLYLDVHIEVYPFLSVSAAHDIGETVRHQIQKSHNQVAEVFIHIGSLQPLNQNAL
	OsMTP7	Os04g23180	MRRPFAAAAALRLRLLSSSSSSSSSSSSLPRLPSSPYPLHHLLLLSRRSGDHHDHDHPSPPPPFSPRPLLASGVLGLSRWRARARALPPAPSPPRGPVADAPPVRLTLSRSYSLRVAKAKKKAHFDDEHSHRAVNTALWCNFLVFSLKFGVWLSTSSHVMLAELVHSVADFANQALLAYGLSSSRRAPDALHPYGYSKERFVWSLISAVGIFCLGSGATIVHGVQNLWNSQPPENIHYAALVIGGSFLIEGASLLVAIKAVRKGAAAEGMSIRDYIWRGHDPTSVAVMTEDGAAVTGLAIAGASLVAVQTTGNAMYDPIGSIIVGNLLGMVAIFLIQRNRHALIGRAIDDHDMQRVLEFLKADPVVDALYDCKSEVIGPGFFRFKAEIDFNGVVLVQNY…
	OsMTP8	Os02g53490	MDGDDRRTPLLGGEGGSTRPPSLRRRDSARSLRSTFLSRLPDKVRGGGDPERPAADVDLTRAKGLSQGEKEYYEKQLATLKIFEEVEALCMPGEFESDAEVLELEDKEQKQSESAMKISNYANIILLVFKVYATIKTGSMAIAASTLDSLLDFLAGGILYFTHLTMKSVNIYKYPIGKLRVQPVGIIVFAAIMATLGFQVLIQAIEQLVENKAGEKMTPEQLIWLYSIMLSATVVKLALYIYCRSSGNSIVQAYAKDHYFDVVTNVVGLVAAVLGDKFFWWIDPVGAVLLAVYTIVNWSGTVYENAVTLVGQCAPSDMLQKLTYLAMKHDPRVRRVDTVRAYSFGALYFVEVDIELSEDMRLGEAHSIGESLQDKIEKLPEVERAFVHVDFESTHKPEH…
	OsMTP8.1	Os03g12530	MEAKGENDARAPLLAERRRNSVGSMRGEFVSRLPKKVLDAVDPERPSHVDFSRSKGLREGEKEYYEKQFATLRSFEEVDSIEESNVMSEEDDIAEQKQSEFAMKISNYANMILLALKIYATIKSGSIAIAASTLDSLLDLMAGGILWFTHLSMKSINVYKYPIGKLRVQPVGIIIFAAVMATLGFQVFVQAVEKLIVNETPDKLTPVQLTWLYSIMIFATVVKLALWLYCRTSGNKIVRAYAKDHYFDVVTNVVGLAAAVLGDMFYWWIDPVGAIALAVYTITNWSGTVWENAVSLVGESAPPEMLQKLTYLAIRHHPQIKRVDTVRAYTFGVLYFVEVDIELPEELPLKEAHAIGESLQIKIEELPEVERAFVHLDFECDHKPEHNILSKLPSSQP
	OsMTP9	Os01g03914	MGSRGRRGGGERETETEEDETWKLRVGDDFTVPERFHRKPPFFSRIFPAGSHGKHRKIAKYYKKQENLLKDFSEMETMNEIGSLDQNAPTEEELRQMAKGERLAINLSNIINLILFIGKVLASVESLSMAVIASTLDSLLDLLSGFILWFTAHAMKKPNKYSYPIGKRRMQPVGIIVFASVMGTLGFQVLIESGRQLITNEHQVFDHRKELWMIGSMSSVAVVKFFLMLYCRSFKNEIVRAYAQDHFFDVITNSVGLVSALLAVRYKWWMDPVGAILIAVYTITTWARTVVENVGTLIGRSAPAEYLTKLTYLIWNHHEEIRHIDTVRAYTFGTHYFVEVDIVLPGDMPLSHAHDIGESLQEKLEQLPEVERAFVHVDFEFTHRPEHKAEV
	OsMTP11	Os01g62070	MAAAVAGGGEEGEELLLLSAVEAGSFGGGGDGGGAGAAAEKSWRLNFDGFRPPEVQQERRPPRGLHHHCLGVLSQGPEDVVAEYYQQQVEMLEGFNEMDTLTDRGFLPGMSKEEREKVARSETLAIRLSNIANMVLFAAKVYASVRSGSLAIIASTLDSLLDLLSGFILWFTAFSMQTPNPYRYPIGKKRMQPLGILVFASVMATLGLQIILESVRSLLSDGDEFSLTKEQEKWVVDIMLAVTLVKLALVLYCRTFTNEIVKAYAQDHFFDVITNMIGLVAALLATYIEGWIDPVGAIILAIYTIRTWSMTVLENVHSLVGQSASPEYLQKLTYLCWNHHKAVRHIDTVRAYTFGSHYFVEVDIVLPSSMPLQEAHDIGEALQEKLERLPEIERAFVHL…
	OsMTP11.1	Os05g38670	MAAAAGVAAGTGRGSGEGEELLPNAVEGDGGCGGGGTCAGDRPWRLNFDGLRRPEAHQEKPPRRFHDRLGGLAEDIILKGGKRTHPETCFLKKLLYPFDAVLRNLDISVQSPGDDVAEYYQQQSELLEGFNEMDTLTDRGFLPGMSKVYILALEECEKVARSEALAIRLSNIANMVLFAAKVYASIRSGSLAIIASTLDSLLDLLSGFILWFTAFSKKTSNPYRYPIGKRRMQPLGILVFASVMATLGLQIILESTRSLFYDGDTFRLTKEQEKWVVDIMLSVTSVKLLLVVYCRSFTNEILAIYTIRTWSMTVLENVHSLVGQSASPEYLQKLTYLCWNHHKAVRHIDTVRAYTFGSHYFVEVDIVLPCDMPLQEAHDIGEAPQEKLESLPEIERAFV…
	OsMTP12	Os08g32650	MAGRHAPHLRLAVPPRLSPHPSFRFPTTPLPTPSKTRLHHPSSSPYAAALLRLLALHSLFLLAPAARAPASSFPSLPPLLALLSAAVSLLLPPFSAAAAAHHPFPAVTHLLRPAALLAVTLLLRFASLRLLASPGTLVLAESAGALLARALRRPSRRRVVSVAVASFALFFFASPSSSSSSTSHLLVLLPFASGLVSSADQTPSVRHVTRGRHARAAVFALAAAFLSVPAVLGLFFVGGSDAGDGDGDGGAVLPISQLWWLLLNAAVFGMVLGRRPDYDGSSSRPSVDFAMTFLCTLVLELLYYPKLSLPGFLICGLLLWIASRELAASGYVELGSADVSESVYEAIMGPVRHILNERKSRKIAAFLLINTAYMFVEFTSGFMSDSLGLISDACHMLFD…
Sorghum bicolor	SbMTP1	Sb09g002460	MMESNNPSHSQIAEVKMDISASASGAAGYKFCKGAACDFSDSSNSSKDAKERSASMRKLIIAVILCIIFMTVEVVGGIKANSLAILTDAAHLLSDVAAFAISLFSLWAAGWEATPQQSYGFFRIEILGALVSIQLIWLLAGILVYEAIVRLINESGEVQGSLMFAVSAFGLLVNIVMAVLLGHDHGHGHGHSHGHSHDHGHGDSDDDHSHHEEQEQGHVHHHEHGHGSSITVTTHHHHHHHSGTGQHHDVEEPLIKHEADCEGTQSAAKAAKKPRRNINVHSAYLHVLGDSIQSIGVMIGGAIIWYKPEWKIIDLICTLIFSVIVLFTTIRMLRNILEVLMESTPREIDATRLQRGLCEMEGVVAVHELHIWAITVGKVLLACHVTIAREADADQILDK…
	SbMTP5	Sb04g038530	MDTPTAKASWNANYGVVGSGDRRLAFSRQLSSNAITPRLARSDSSISMPIPLPLPSVYEGPKPSRKLLRLAAASRPMRRLALLLALNVAYSATEFAIGLFTGRVGLVSDAFHLTFGCGLLTFSLFAMAASRTKPDNLYTYGYKRLEVLAAFTNALFLLFLSFSLAVEALHAFMQDESEHKHYLIVSAVTNLLVNLLGVWFFRSYARFNIVYRNAEDMNYHSVCLHVLADSIRSAGLILASWFLSLGIENAEVLCLGIVSVAVFMLVLPLFKATGNILLQIAPSNVPPSAFTKCSRQIAACEDVSEVWQGRFWELVPGQAVGSVSIRVKSGADDRGVLEYTHGLYQDLGIQDVTVHTDES
	SbMTP6	Sb01g035530	MGFRFARLAARAAASRRGMTPAASARRALAPPALPAESRCGPHWLVPARGHVGHSHHHGGEDGGETSERIFRLGLAADVVLTVGKAVTGYLSGSTAIAADAAHSLSDIVLSGVALLSYRAAKAPRDKEHPYGHGKFESLGALGISSMLLVTSGGIAWHAFEVLQGVMSSAPDIIGNTLHAHHDHGSSGHHHGIDLEHPVLALSMTTLAISIKEGLYWITKRAGEKEGSGLMKANAWHHRADAISSVVALVGVGGSILGLPLLDPLAGLVVSGMILKAGIQTGYESVMELVDAAVDPSLLEPIKETILRVHGVKGCHRLRGRKAGTSLYLDVHIEVYPFLSVSAAHDIGETVRHQIQKEHNQVAEVFIHIDPSYSVGLSMDLKRNMKNSDGTNSEAIPRQ…
	SbMTP7	Sb006G03940	MRRPLASAALRLRCLSSTSPTRLLSPCPFLLSRRDDDDGREGPTSPLPPLPPSGSAFSPRPLLFSASAAAGLFSLRGGWWRRALPPAASRPPGAVADAAPVRLTISRSYSLRVAKGKKKAHFDDEHSHRAVNTALWCNFLVFSLKFGVWISTSSHVMLAELVHSVADFANQALLAYGLSSSRRAPDALHPYGYSKERFVWSLISAVGIFCLGSGATIVHGVQNLWNSQPPENIHWAALVIGGSFLIEGASLLVAIKAVRKGAEAEGMSIWDYIWRGHDPTSVAVMTEDGAAVTGLAIAAASLVAVQMTGNAMYDPIGSIIVGNLLGMVAIFLIQRNRHALIGRAIDDHDMQRVLEFLKSDPVVDALYDCKSEVIGPGFFRFKAEIDFNGVVLVQNYLER…
	SbMTP8	Sb04g034705	MEGDDRRAPLLGSGADADAGGRPPSLRRRDSARSLRSSFLSRLPDKVRAGLDPERLADLDLSRAKGLSQGVRDYYEKQLATLRTFEQVEARCMPGEFDSDVEASDSEETEQKQSEFAMKISNYANIVLLVFKVYATIRTGSMAIAASTLDSLLDFMAGGILWFTHLSMKRVNIYKYPIGKLRVQPVGIIVFAAIMATLGFQVLVQAVEQLVENKPGEKMTREQLIWLYSIMLSATAVKLALWLYCKSSGNSIVRAYAKDHYFDVITNVVGLVAAVLGDKFLWWIDPVGAVILAVYTIVNWSKTVLENAATLVGQCAPPEMLQMLTYLAMKHDPRVRRVDTVRAYSFGPLYFVEVDIELSEDMLLREAHTIGELLQEKIEKLPEVERAFVHIDFESTHKP…
	SbMTP8.1	Sb01g041820	MDAENDDARAPLLAAGPGRRRNSVASMRGEFVSRLPKKVLDAVDPERPSHVDFSRSKGLREGEREYYEKQFATLRSFEEVDSLEESNEINEDDELAEQIQSEFSMKISNYANIVLLALKVYATIKSGSIAIAASTLDSLLDLMAGGILWFTHLSMKSINVYKYPIGKLRVQPVGIIIFAAVMATLGFQVFIQAVEKLIVNEAPDKLNQVQLLWLYSIMIFATVVKLALWLYCRTSGNKIVRAYAKDHYFDVVTNVVGLAAAVLGDRFYWWIDPIGAIALAVYTISNWSGTVWENAVSLVGESAPPEMLQKLTYLAIRHHPQIKRVDTVRAYTFGVLYFVEVDIELPEDLPLKEAHAIGESLQIKIEELPEVERAFVHLDFECDHKPEHSILSKLPSSQP
	SbMTP9	Sb03g007250	MGSPNQRHGGGGGSDEEGDAGSWRLRMDSGGFSVPDRFHRQPPPFYARIFVGGSHGKQRKIAKYYKKQENLLKDFSEMETMNELGGLDPNAAPSEEEQKQLAKSERFAINLSNVINLILFVTKVVASIQSLSMAVIASTLDSLLDLLSGFILWYTAYKMKKPNKYNYPIGKRRMQPVGIIVFASVMGTLGFQVLIESGRQLITQEHANFELKQELWMVGSMSSVAVVKFFLMLYCRTFKNEIVRAYAQDHFFDVITNSVGLVAALLAVRYKWWMDPVGAILIALYTITTWARTVLENVGTLIGKSAPAEYLTKLTYLIWNHHEEIQHIDTVRAYTFGTHYFVEVDIVLPGDMPLSQAHDIGESLQEKLEQLPEVERAFVHVDFEFTHRPEHKAEV
	SbMTP11	Sb03g039220	MASAAAEANGGEGEELLLLSAAEAGRGGGATAEAEESWRLNFEGFRPPEAHQERPPTGPLHHCLGVLAQGPEDVVAEYYQQQVEMLEGFSEMDTLTDRGFLPGMSKEEREKVARSETLAIRLSNIANMVLFAAKVYASVRSGSLAIIASTLDSLLDLLSGFILWFTAFSMQTPNPYRYPIGKKRMQPLGILVFASVMATLGLQIILESIRSLASDGDEFSLTSDQEKWLVDIMLSVTLVKLALVIYCRSFTNEIVKAYAQDHFFDVITNIIGLVAALLANYIEGWIDPLGAIVLAIYTIRTWSMTVLENVHSLVGQSASPEYLQKLTYLCWNHHKAVRHIDTVRAYTFGSHYFVEVDIVLPSNMPLREAHDIGEALQEKLERLPEIERAFVHLDYEFTH…
	SbMTP12	Sb07g020630	MSGRHAPQLRLAVPPRLSAHPSFRFPSTPLPTPSKARGLPYSSSASPSSSPYAAALLRLLVLHALFLLAPAVRALPSLAHALALSPPLALLSAAALLLLHFAAASRKNHHQPHHPFPGIPALLRPALLLALSILLRLVALRFLPSPGLLVLADSAGSLLARALRRPSRRRVLSVAVAALSLVCISPSPSLILAIPFASGFLSSAEQSAAARHATRTRRARAAAFALAAAFISVPALVGLSLFGGSDAGDAPDGAVSIGPLWWLLLNSAFFGMALGRRQEHGSGGGRPSVDFAMTFLCTLVLELLYYPKLSLPGFLICGFLLWIASRELAPAGYVQLGTEDVSESVFEAVMGPVRHILSERKSRKIAAFLLINTAYMFVEFGSGFMSDSLGLISDACHML…
Vitis vinifera	VvMTP1	GSVIVT01019690001	MSIVRPLRPASRGYRYAIIQSLFFLQVGILYSEHDCLKMEVQNLEHGNIIEIHGDVPTVETSLSRSKICEGATCGFSDAKTISKDDKERAASMKKLLIAVVLCIIFMSVEVAGGIKANSLAILTDAAHLLSDVAAFAISLFSLWAAGWEATPRQSYGFFRIEILGALVSIQMIWLLAGILVYEAVARIIHDTGEVQGFLMFIVAAFGLVVNVVMALLLGHDHAHGHGGHDHGHGGHDHGHVMTTIMLMKLQKTQRNINVQGAYLHVLGDSIQSIGVMIGGAIIWYKPEWKIIDLICTLIFSAIVLGTTIRMLRNILEVLMESTPREIDATRLEKGLYA
	VvMTP4	GSVIVT01024865001	MEYFSPHRERIFPLKARQQWAFFFLVPSDSEMEDNEVSIRTEHQQEIEMSKASKENVLTMPSQLSCCHICAFSQHEISRSESEQRSKSSRKLCGLIIFYLIFMAVEIVGGIKSNSLAVLTDAAHLLSDVFGFSISLFAVWASGWRATSQQSFGFNRVEVLGALFSVQLIWLIAGILIYEAVNRILHQHAKVNGKLMFAIAAFGFISNLIMSTKLVSSSPEKTKILNINLQGAYLHVMADLIQSVGVMVAGGIIWAKPEWLMVDLVCTLCFSVLVLTTTLTMLRNIFSILMERAPIEIDIAGLENGLKSIKGVQDVHDLHVWAITVGKVVMSCHVIAEPGATSSEILGDIRDYCEKTYRILHVTVQVE
	VvMTP5	GSVIVT01033491001	MENSGSSDQWNKEFGFGTSDRRFAYSRQASFHQLQEPHTPISIISNDHKKPLLCRTVSSIDIPPTIYPLEENEKFSIEGKDFPEKASFLLVVLWVFRVVRSGNRPMRKLFVMISLNVAYSTAELMIGLFTGRAGLVSDAFHLTFGCGLLTFSLFAIAVSRNKPDQVYTYGFKRVEVLSAFTNALFLLFMSFSLAVEALHAFIQDESEHKHYLIVSAVTNLLVNLIGVWFFRNYARINLVYRKAEDMNYHSVCLHVLADSIRSAGLILASWFLTLGVKNAEVLCLGLVSVAVFMLVMPLFKTTGGILLQMAPPSIPPSALSKCRRQITAHEDVLEVSQACFWELVPGHVVGSVTLQVKDGIDDCPMLQYVHDLYHDLGVKELTVQADCS
	VvMTP6	GSVIVG01010968001	MGFRFQNLNSIHKTLVSRISSHTHGTLLQTPNFPNPTTRSFIPQSYDPSSIFPHNPIFRVPRRWHFGHSHNHHDHQHHHSSEVGESIFRLGLFADIGLVTGKTLTGYLSGSTAIIADAAHSASDVVLSGVALWSYKVAKAPKDKEHPYGHGKFETLGALGISCMLLATAGGIAWHAVDVLLGVLSAAPEVINHSLAHEHVHSHHHSGHHHGIDVDHPVLALSMTVVSIAIKEGLYWITKRAGERQGSGLMMANAWHHRVDAISSVVALIGVGGSILGVKFLDPLAGLVVSGMILKAGLGTGYQSVMELVDAAVPVQQLDPIKETILQVDGVKGCHRLRGRRAGSSLYLDVHIEVDPFSSVSAAHNVGENVRHQIHKSHPGVSEVFIHIDPAISQISPSI…
	VvMTP7	GSVIVT01029626001	MQRSINKKIGSCLLRFTPSPSPALLTRHHYSHFPLSRLLTLSQFLHSSPSFNHNLQQPSSYCKFPENGALFFAPRPILRNFLCSCGTSLDSNRHYINRNFFTRAKEVKNIEINDQHSQRAVRTALWCNFLVFSLKFGVWLTTSSHVMLAEVVHSAADFANQALLAYGLSSSRRAPDAIHPYGYSKERFVWSLISAVGIFCLGSGATIVHGVQNLWTSHPPANIQYAALVIGGSFLIEGASLVVAIHAVKKGAAAEGMKVRDYVWRGHDPTSVAVMTEDGAAVTGLIIAGASLVAVNTTGNPIYDPIGSIVVGNLLGMVAIFLIQRNRHALIGRAIDAHDMEKVLNLLKNDPVVDALYDCKSEVIGPGFFRFKAEIDFNGVVVVQNYLKRTGRETWARQF…
	VvMTP8	GSVIVT01033471001	MDPVKTPLLSTKGEKPNQHERIRGRDSVTALKRDFFSQLPEKIRSQLDPETPFELDLSKTNGLVEGEREYYEKQFATLRSFEEVDSLASSHVTSEEQDREQQTQHERAMKTSNWANIFLLVFKIYATVRSGSLAIAASTLDSLLDLLAGGILWFAHLSMKNINIYKYPIGKLRVQPVGIIVFAAVMATLGFLVLIQAVEELIKNEPSEKMTSEKLVWLYAIMLTATVVKLALWFYCRSSGNKIVRAYAKDHYFDVITNIVGLIAAVLGDKFFWWIDPVGAIILAVYTISNWSRTVLDNAVSLVGQSASPEVLQKLTYLVIRHDPKIKRVDTVRAYTFGALHFVEVDIELPEDLPLKEAHAIGESLQIKIEELLEVERAFVHLDFECDHKPEHSVPSKIP…
	VvMTP8.1	GSVIVT01025383001	MDGDSGSEPKSPLLSKSDGWRFSESRRRGRLSRRNSSNSLRNEFVSRLPEKIRSGIDVESPSHLDLSKSKGLSEGEKEYYERQWATLKSFEEVDSLMTSNYIDEEDLVEQAEQAEQAQQEMAMRISNYANVVLLAFKIYATIKSGSIAIAASTLDSLLDLMAGGILWFTHLSMKNINIYQYPIGKLRVQPVGIIIFAAIMATLGFQILIEAVEELVKDKASDKMSSDQLIWLYTIMLSATAVKLALWLYCRTSRNKIVRAYANDHYFDVITNVVGLVAAVLGDKFYWWIDPVGAIFLAVYTITNWSQTVLENAVSLVGQSAAPEVLQKLTYLVIRHPQVKRIDTVRAYTFGVLYFVEVDIELPEDLPLKEAHTIGETLQIKIERLPEVERAFVHLDFEC…
	VvMTP9	GSVIVT01026116001	MKSETGEDYRTELLHQARPEAKSWRLNLREFRLPERRSADPPFSLKGLLHHMTPRKKGKVAEYYKKQERLLEAYNEMETINSMGCLPGRLTEDELKQLEMNERMAIYASNIANLVLFTAKVYASFESRSLAVIASTLDSFLDLLSGFILWFTAHAMRTPNQYRYPIGKKRMQPVGIIVFASVMATLGLQILLESVRQLISGSRSKMDGEKEKWMIGIMVSVTVVKFVLMVYCRRFKNEIVSAYAKDHFFDVITNSIGLATAVLAVHFYWWIDPVGALIIAGYTIGTWAKTVIENVWSLIGRSAPPDFLAKLTYLIWNHHEDIKHIDTVRAYTFGSHYFVEVDIVLPEDMFLGRAHNIGETLQEKLEQLPEVERAFVHIDFEFTHRPEHKTKV
	VvMTP9.1	GSVIVT01036746001	MQTELQSESFDYRTELLSPALPGENGSAMRVPSWRINFEEFQVAEKQKDSNFGVAKLVKTIRKQKKLADYYKKQGKLLEGFNEVDAFTELGVLPGSLTEDEMKQLANNERLAIQASNIANMVLFIAKVYASVESRSLAVIASTLDSLLDLLSGFILWFTASAMRKPNQYQYPIGKKRMQPVGIVVFASVMATLGLQILFESGRELIIKAQPDRDPVKERWMIGIMVSVTVIKFALMTYCRRFKNEIIRAYAQDHFFDVITNSIGLVTAVLAIHFFWWIDPLGAILIALYTMATWAKTVMENVWSLIGRTAPPEFLAKLTYLIWNYHEEIKHIDTVRAYNFGSQYFVEVDIVVPEDMSLTQAHNIGEALQEKLEQLPEVERAFVHIDFEYTHKPEHMPKKC
	VvMTP11	GSVIVT01016640001	MVEPVILDGDLDGSEELLLRPTPKNGDRSWRLNFDGFQLSEHKEKKPPRSLHDCLGVLAPGPEDDVAEYYQQQVEMLEGFNEMDALAEHGYIPRMTEEEREKLARSETTAIRISNIANMILFAAKVYASVMSGSLAIIASTLDSLLDLLSGFILWFTAFSMQTPNPYQYPIGKKRMQPLGILVFASVMATLGLQIILESVRTLSSDEAEFDLTREQEQWVIGIMLSVTLTKLILAVYCRAFTNEIVKAYAQDHFFDVITNIIGLIAVLLANYISDWMDPVGAIILALYTIRTWTLTVLENVNSLVGRTAAPEYLQKLTYLCWNHHKAIRHIDTVRAYTFGSHYFVEVDIVLPANMPLQEAHDIGESLQVKLELLPEIERAFVHLDYEYSHKPEHAQTSS
	VvMTP12	GSVIVT01032551001	MSWYRIECFPLSSMIVDKWGFSLFPRENCVRVLPMLLPFLSGFLGCYERVSMNWGTIRQLGRKRVRLISLFFTTVILFVPAVVSILMFEAEGDEFSIASLGWPLANTVLFGVLLTENYSDEKLVSSRDFQREFLVTFFCTLVLELFYFPELSLWGLLLCGLLLYISVRELDPVYSNSLELGMDSSESFTDSIVKPIRHVLSERKSRKIALFLLINTGYMVVEFVSGFMSNSLGLISDACHMLFDCAALAIGLYASYISRLPANSQFNYGRGRFEVLSGYVNAVFLVLVGALIVLESFERILEPQEISTNSLLTVSIGGLLVNVVGLIFFHEEHHHAHGGSCSHSHSQSHSHSDLHHHSHACGGHDHTVQVGHQECTSTSQDCHEKSSIPAISSRNLQSH…
Camellia sinensis	CsMTP1	c114075.graph_c2	MEENTCQHGQIIEISGEIPEGKRSLEGSKICGEAPCGLSDAVCIRVEENTRQHGKIIEVSGEVPVGKRSLGGSKICGEAPCGFADAATSSKDAMERSASMRKLIIAVALCVVFMGVEVAGGIEANSLAILTDAAHLLSDVAAFAISLFSLWAAGWEATPRQSYGFLRVEILGALVSIQLIWLLAGVLVYEAIVRLIHETDEVNGFLMFIVAAFGLVVNIGMAALLGHDHSHSGHGHSHGHGHGHGHSRSHGHNDHDHKHGVRITTRPHSHEEHPRDEEHGHAHKEDLVEPLLNNTSSQDKSKKQKKRNINLQGAYLHVLGDSIQSVGVMIGGAIIWYKPQWKIIDLICTLIFSVIVLGTTIQMLRNILEVLMESTPREIDATKLEMGLCELDDVVAIHE…
	CsMTP3	TEA010576.1	MKYREEKMEDQTHQHGQIIEISGEVPVGETSLGGSKICGEAACGFSDAVTISKDAKERSASMRKLFIAVALCVVFMSIEIVGGIKANSLAILTDAAHLLSDVAAFAISLFSLWAAGWEATPRQSYGFFRVEILGTLVSIQLIWLLAGILVYEAITRLIHETGTVNGFLMFIVAAFGLVVNIIMAVMLGHDHSHGGHDHGHSHSHNDHVHDRSHGLKITHHCSREEHHHSHEEHEEYSHTGEEAIVEPLLKKSSQDKSKPKSEHEQKKRRNINVQGAYLHVLGDSIQSVGVMIGGAVIWYKPEWKIIDLICTLIFSVIVLGTTIKMLRNILEVLMESTPREVDATKLGKGLCEIDEVMAIHELHIWAITVGKVLLACHVKIRPEADADLVLKKVIDYIRR…
	CsMTP4	TEA010440.1	MEYQEVSSLRKDHREVEMTVAFEENSDPPLPLHCNHVCAFSTKEYDNLASNQRSKSIVKLCGLIIFYIIIMAVEVVGGIKANSLAILTDAAHLLTDIAGISLSLFTVWASSWDATSHQSFGFNRLEVLGALISVQLIWLICGVLIYEAVDRILHENATVNGKLMFAIAALGFVINFIMVVWLGHGHGHGHANSHCHSHSNSHHACTDTDHEKEELCTRDKEESASLVASMPEKTERLNINVQGAYLHVMADLIQSVGVMIAGSIIWAKPKWFVVDLVCTLVFSIFALAATIPMLRDITCILMERTPSEINIASLENGLKCIKGVDDVHDLHVWAITIGKTVLTCHVIAEAGVNSNEILVRIKDYCEKTYDIHHVTIQIEQ
	CsMTP5	c121777.graph_c0	MKTTSFHYQKLETESPRSWNAEFDRRYAFSRQTSFHNQSAEPISVISNSNDPVKKPFLSRTASSIDIPPSFNPQDESESRWTEEKGSDEKYSVLFFVLSGFSIMRSGNRPMKRLLLMISLNVAYSTAELFIGLLSGRVGLVSDAFHLTFGCGLLTFSLFAMAASRKKSDRLYTYGYKRLEVLSAFTNALFLLFMSFSLAVEALHAFIQDESEHKHYLIVSAVTNLLVNLIGVWFFRNYARINLVYRKAEDMNYHSVCLHVLADSIRSAGLILASWLLTLGVKNAEVLCLGLVSVTVFMLVMPLFRATGGVLLQMAPPSIPSSALSKCWRQVMSREDVSEVSQARFWELVPGRVVGSLTLQVKKGMDERPILQYVHGLYHDLGVHDLTVQTDYA
	CsMTP6	c206396.graph_c0	MGLFKFYNLNPIYRSYISRFHTRNHKNRIIQAFGSSEFYDHRPLGRLSESPNYRISKRWHVGHSHHHHQHDRSSEEAEKIFWLGLAADIGLAAGKSLTGYLSGSTAIIADAAHSISDVVLSGVALLSFRAARVPKDKEHPYGHGKFETLGALGISVMLLGTAGGIAWHALDLLLGLLSASPEIVNQSLGHGHMHNHHHGGHHHGIDMDHPVLALNMTIISISVKEGLYWITKRAGEREGSGLMKANAWHHRADAVSSFVALIGVGGSILGVKFLDPLAGIVVSGMILKAGLETGYQSVLELVDAAVPSQQLDLYKQTILQVEGVKGCNHLRGRKAGSSLYLDVNIEVDPFSSVSAAHEVGENVHHVIQKLHPEVAEVFIHIDPAISLFSADTKDQQGNM…
	CsMTP7	TEA010534.1	MRTSRFLTGLRHYPFSALGSSSRSTATALSRTGSITLSEIFETKKLVDHRGGGGGGRGRDRYRGGFFISPFACYGGDRGGFFISFDSNHHHHCCFRRSFFTRAKEIKKLEVQHDHSQRAVTTALWCNFLVFSLKFGVWLSTSSHVMLAEVVHSAADFANQALLAYGLSSSRRAPDAIHPYGYSKERFVWSLISAVGIFCLGSGATIVHGIQNLWTSQPPANIQYAALVIGGSFLIEGASLVVAIHAVRKGAAAEGMTVRDYVWRGHDPTAVAVMTEDGAAVTGLLIAAASLVAVNTTGNAIYDPIGSIIVGNVLGMVAVFLIQRNRHALIGRAIDDHDMERVLHFLRNDPVVDAVYDCKSEVIGPGFFRFKAEIDFNGVILVQNYLKRTGREEWAKQFR…
	CsMTP8.1	TEA028773.1	MEMGIEAPLLINVEGPDTTYRLIKRHSVASLKRDFFSKLPDKVKSGLDDPDQTLFEIDLSKATGLIEGEKEYYERQFATLKAFEEVDSLDTSRVIDNEQDLQEQAQHERAMNISNWANIFLLAFKIYAVIKSGSLAIAASTLDSLLDLMAGGILWFTHLSMKNINIYQYPIGKLRVQPVGIIIFAAVMATLGFQVLIQAVEQLIKNEPTEKMSSDQLIWLYAIMLTATAVKLVLWIYCRSSGNKIVREYAKDHYFDVVTNVVGLIAAVLGDKFYWWIDPVGAIVLALYTIINWSGTVLENAVSLVGQSAPPDVLQKLTYLVLRHHSQIKRVDTVRAYTFGVLYFVEVDIELPEDLPLKEAHAIGESLQIRIEDLPEVERAFVHLDFECDHKPEHSVLSR…
	CsMTP8.2	TEA012253.1	MEGESEAKAPLLVAAATDGRRLSSSGRRLRLSRRNSVNSFRQDFVSRLPDKLRPGLDLESASLIDFSKTTDLTQGEKEYYERQIATLKSFEEADSLMTSDSIDEEDFEEQAQQERAMKISNYANVILLAFKIYATIETGSIAIAASTLDSLLDLMAGGILWFTHLSMKNINIYKYPIGKLRVQPIGIIIFAAIMATLGFQVLVQAVEQLVEDEASEKMTTDQLVWLYAIMLSATAIKLALWFYCRSSGSTIVRAYAKDHYFDVVTNIVGLVAAVLGDEFYWWIDPVGAIALAIYTITNWSGTVIENAVSLVGQSASPEVLQKMTYLVIRHPQVKRIDTVRAYTFGVLYFVEVDIELPEELPLKEAHAIGETLQMKIEKLPEVERAFVHLDYECQHKPEH…
	CsMTP9	TEA003562.1	MMGEKDTRSTTPTGTRGNGEIQDSSSRRELLDMDMDGEQSSSSWRLDVKQFTVPQQRPPSDHHLLHHRFRRLLRYPRKQGKIAEYYKKQEILLEGFTEMETMNESGCLAGNPTEDEMKQLAKSERTAIYVSNVANLVLFVAKVYASYESRSLAVIASTLDSLLDLLSGFILWFTSHAMKKPNLYHYPIGKKRMQPVGIIVFASVMATLGLQILIESGRQLVAKTAPERNLSKEKWMIGIMVSVTFVKFALMVYCRRFKNEIVRAYAQDHLFDVITNSVGLVTAVLAVRYYWWIDPTGAIIIALYTITTWTRTVLENVGSLIGRTAPPDFLAKLTYLIWNHHEEIKHIDTVRAYTFGSHYFVEVDIVLPEDMLLSQAHNIGEKLQEKLEQLPEVERAFVH…
	CsMTP10	TEA009453.1	MIINNMNEIEVSAEAEQTSSSSWRLNLKEFNLPPPQRRRDHHSSFSFRRLIPPPRKQGKIAEYYKKQESLLVGFNEMETMNTSGGLPGNLTDDELKHLAQSERMAINVSNIANLVLFMAKVFASIESRSLAVIASTLDSLLDLLSGFILWFTAHAMKNPNQYHYPIGKKRMQPVGIVVFASVMATLGLQILLESARQLMAKVGPNTNPQKEKWMIGIMVSVTVVKFVLMVYCRRFKNEIVRAYAKDHFFDVVTNTVGLATAVLAIRFYWWIDPTGAIIIALYTISTWAKTVLENVWSLIGRTAPPDFLAKLTYLIWNHHEEIKHIDTVRAYTFGSHYFVEVDIVLPEDMVVSEAHNIGETLQEKLEQVPEVERAFVHIDFEFTHRPEHKSKV
	CsMTP11.1	TEA004983.1	MVEPVAVEGDREWSEEELLLPDLNNAADRDWRLNFDSFQLSELKEKPPPRGLHHSCLGVLRPEDNVAGYYQQQVEMLEGFNEMDALAQRGFLIGMSKEDKEKLARSETTAIRLSNVANMILFAAKVYASVRSGSLAIIASTLDSLLDLLSGFILWFTAFSMQTPNPYQYPIGKKRMQPLGILVFASVMATLGLQIILESVRTLISVDSEFNLTDEQERLVVGIMLSVTLVKLFLVVYCRSFTNEIVKAYAQDHFFDVITNVIGLVAALLANYFSDWLDPLGAIILALYTIRTWSLTVLENVNSLVGKSAAPEYLQKLTYLCWNHHKAIRHIDTVRAYTFGSHYFVEVDIVLPAGMPLQEAHDIGESLQVKLELLPEIERAFVHLDYEYTHKPEHTQAHH
	CsMTP11.2	TEA033209.1	MVEPVAVEGDREWSEEELLLPDLNNAADRDWRLNFESFQLSELKEKPPPRALHHSCLGVLRPEDNVAGYYQQQVEMLEGFNEMDALAQRGFLIGMSKEDKEKLARSETTAIRLSNVANMILFAAKVYASVRSGSLAIIASTLDSLLDLLSGFILWFTAFSMQTPNPYQYPIGKKRMQPLGILVFASVMATLGLQIILESVRTLISVDSEFNLTDEQERLVVGIMLSVTLVKLFLVVYCRSFTNEIVKAYAQDHFFDVITNIIGLIAALLAKYNSDWMDPVGAIILALYTIRTWSLTVLENVNSLVGKSAAPKYLQKLTYLCWNHHKAIRHIDTVRAYTFGSHYFVEVDIVLPASMPLQEAHDIGEALQEKLELLPEIERAFVHLDYEYTHKPEHAQSHS
	CsMTP12	TEA006333.1	MADHHHHHHRPHRLSLPSRTAIPTTIAAAAATSTPRSYPVYPYPPSTPTPTPSKHRLSILNINNKSPTKKTSLSFLFLLLFSLRSLYSLLPFLRSSPSSFSIFPFSFLVSLLSFLFSFAFSLFSPSSSRQKQQLQPIFSLSSISPSQHRLLLSKSLLLAIVFLIRFQALLYCGTAAMILAELSGNVAARFFFEGRNRHLDRIRSSKVRGFFLLFIGLFLLSVSWDRIECFPFSAVNVAKFGFSVVPSENCFRIWPMLLPFLSGFLGCYERVSMNWVSVRELGQKRVRLISLFYTTVVLFIPAVVSMFLFEADGDSISIGSLGWPLANTVVFGVLLSENYSDEKLVNSKDLQREFLVTFVCTLLLELFYFPELSLWGLLICGLLLGIAVRELDPLYSSYL…
