# Supplementary material for: Metal Tolerance Protein Encoding Gene Family in Fagopyrum tartaricum: Genome-Wide Identification, Characterization and Expression under Multiple Metal Stresses
Source: Plants (Basel). 2022 Mar 23;11(7):850. doi: 10.3390/plants11070850 (PMC9003181; doi:10.3390/plants11070850)
Supplement: Supplementary file 1 [file plants-11-00850-s001.zip › Supplemental Table S2.xlsx]

## Sheet: Sheet1
Table S2 Sequences of FtMTPs
Gene name	GeneID	Protein sequence
FtMTP1	FtPinG0002597700.01	MQTDRRHIVEVHQDVHGGKKTTEESSSKLNGEASYIQIQTDRHHIVEDLEINQDVLGGKRTIEGSSSKLCGEVPCGFNDSGSSSKDAKERSASMRKLFIAVSLCILFMIIEVVGGIKANSLAILTDAAHLLSDVAAFAISLFSIWASGWEATPRQTYGFFRVEILGALVSIQLIWLLAGILVYEAILRLINNTGEVNGFLMFLVAAFGLVVNIIMAVLLGHDHGHTHGHTHDHGHTHGHSHDHGHSHDHGHDHDHDHDHTSPSHIQRRTVVLSHNEHHHHHIDDHNHSEPLLSDNKEKKKRNINVQGAYLHVLGDSIQSIGVMIGGAVIWWKPEWKIIDTICTLIFSVIVLGTTIKMLRDILEVLMESTPREIDATQLQTGLLEIDEVVAVHELHIWAI…
FtMTP3.1	FtPinG0007468900.01	MEVGNPEHGHLIEVSRDISGTQTSPGRFVCSGAVCGFKDDNSSSKDAEERSASMRKLLMAVILCVIFMAVEFAGGIKANSLAILTDAAHLLSDVAAFAISLFSLWASGWEATPRQTYGFFRIEILGALVSIQMIWLLAGILVYEAVARIFTETSEVNGFLMFAVATFGLVVNILMALLLGHDHGHGHGHGHGHGHGHRGHGGHDHHGHSHSHEGQTHKHTHDISIQSPKGIPKQSDHHHHQPLLGESGCNNESKPKNAPTKSKQRNINVQGAYLHVLGDSIQSIGVMISGGLIWFKPEWKVIDLICTLFFSVIVLGTTINMLRNILEVLMESTPREIDATKLEKGLCEMEEVLAIHELHIWAITVGKVLLACHVKIKPDADADAVLDKVIDYIRREYNI…
FtMTP3.2	FtPinG0004200900.01	MEVQKSEHGHFIEVSADISDAQTSQGRRTCSGAVCGFADATTITSDAEERSASMRKLIMAVVLCVLFMGVEVAGGIKANSLAILTDAAHLLSDVAAFAISLFSLWASGWEATPRQSYGFFRIEILGALVSIQMIWLLAGILVYEAIARIINDTGEVNGFLMFAVATFGLVVNILMAFLLGHDHGHGHGHGHGHGHGHGHGHGHGHGHGHKHSGHDHGQSGHGHKHEHEDHNTKHSHDISIISHPHSHGGTTKHHHHDHDSTIDQPLLGNPNCNSESQSKSGGKQSRKRNINVQGAYLHVLGDSIQSIGVMISGGIIWYCPDWKILDLICTLLFSVIVLGTTINMLRSILEVLMESTPREIDATKLEKGLCEMDEVVAIHELHIWAITVGKVLLACHVKI…
FtMTP5	FtPinG0009580000.01	MGTKGWRLCLPSPMLQLFLLFMSFSLAVEALHAFIQDESEHKHYLIVSAVTNLSVNLIGVWFFRNYARVNLAYRNAEDMNNHSVCLHVLADSIRSAGIILASWFLSLGIENAEVLCLGLVSVIVFMLVLPLFKATGGVLLQRASPGIPPSAMSKCYRQVSSHEDVVDISEARFWELMPGHIVGSVSLQVKPGIDDRAVLQYTHGLYHDLGVKDLTVQTFVAEPEGNGLHS*
FtMTP6	FtPinG0006378700.01	MKANAWHHRADAVSSLVALIGVGGSILGVKVLDPIAGLVVSGMILKAGLESGYQSILELVDAALPQQELEPHRQTILKVEGVKGCHRLRGRRAGSFLYLDVHVEVDPFTSISDAHHVGETVRRHLHESHPEVSEVFIHIDPAISEVLPDAVHPREEWDVEQQSYVDVDCPIDLDNTVTKIFMLKFKEKVAIEHITRHVLQGKILLEIEVSMPRDTIVRDAIQMAESARGEILKMICNVIEVKIQLRLLQSNHKLPS*
FtMTP7.1	FtPinG0000904200.01	MHRSELINPRKFVLRVSRLLPVLNHHLDHSIPQFHPQFHHISHKTFKSHSQSRPDSPPATIRRTLLLLHYFSKVNSLGPSYSSSQFSSHQLFTRRNFWTRAEEVRIEVNDKRIEVSDQNSQRAVTTALWCNFFVFSLKFGVWFATSSHVMMAEVVHSVADFANQMLLAYGLSSSRRAPDAIHPYGYSKERFVWSLISAVGIFCLGAGATIVNGVQNLWTSQHPEHVEYAALVIGGSFVIESVSLVVAINAVKKGAAAEGMKLRDYIWRGHDPTAVAVMTEDCAAVSGLAIAAASLIAVHVTGNAIYDAIGSIVVGNLLGMVAIFLIQRNRRALIGRAIDDHDMEKVMHFLKNDPVVDSLYDCKSEVIGPGFFRFKAEIDFNGVVLVQNYINRAGSRAWA…
FtMTP7.2	FtPinG0008097000.01	MQRSELVNPLNFVLRASRILSVLPHHPHPQSHHRLSPTSTQFHCTGQSFRSDSSCCSPSIVGVGVADHALFNSSRAVTRRLLLHSFRKAASIDSNSVGFSTQRLLFRRDFFTRAKEVKRIEINDQHSQRAVTTALCCNFLVFSLKFGVWLSTSSHVMLAEVVHSVADFANQALLAYGLSSSRRAPDAIHPYGYSKERFVWSLISAVGIFCLGSGATIVHGVQNLWTAQPPDHIEYAALVIGGSFLIEGASLIVAIHAVRKGAAAEGMTLRDYIWRGHDPTAVAVMTEDGAAVTGLAIAGASLVAVNATGNAIYDPIGSIIVGNLLGMVAIFLIQRNRHALIGRAIDDHDMEKIMQFLKNDPVVDSVYDCKSEVIGPGSFRFKAEIDFNGVVLVQNYINR…
FtMTP8.1	FtPinG0006632200.01	MADNNHSDNPRSPLLEGTNDRRLSNRRYSVSTLRNRFTSSLPDKLRTGLDPEFPYELDLAKTSGLTQGEKDYYETQFATLKSFDEVDRIVLADSPKDEEEEDEDQKQAERAMKISNYANIILLVFKIFATVESGSIAIAASTLDSLLDLMAGAILWFSHLSMKNVNIYKYPIGKLRVQPVGIIIFAAIMATLGFQILVQALEDLIKGTTSDDYTKTQLIWLCSIMIGATVVKLGLYLYCRTSPNKIVRAYAKDHYFDVVTNVVGLAAALLGDVFYWWIDPVGAIFLALYTIINWSGTVMENAVSLVGQTAPPEVLQKLTYLVLRHPKVKRIDTVRAYTIGVLYFVEVDIELPEDTPLKEAHAIGETLQDKLERLPEVERAFVHLDYECDHKPEHTVLSR…
FtMTP8.2	FtPinG0000879500.01	MGLGEDAKTPLLQVSEKGKGPSISVTNRQKGKIRRRNSVSSLRNDFFSTLPDKVRPALDPESPFCLDLSRTSGLNEGEREYYEKQVATLNAFEDADSLESPLPVVDEEQDQLEQIQQERAMNISNLSNTLLLAFKVYATIKSGSLAIAASTLDSLLDLIAGGILWFTHLSMKNINIYQYPIGKLRVQPVGIVIFAAVMATLGFQVLIEAVEQLIQNKPSSKMDYEQLLWLYVIMGTATIVKLILWIYCRRSRNKIVRAYAKDHYFDVVTNVVGLVAAILGDKYYWWIDPIGAIFLALYTISNWTGTVLENAASLVGQSAPPEMLQKLTYLVLQHHPLIKHVDTVRAYTFGVLYFVEVDIELPEDLPLKEAHAIGESLQIKIEKLTEVERAFVHLDFECD…
FtMTP9	FtPinG0000534400.01	MATASAVAGEESWRLNLDNFRLPSDSNRQNSSQSPFMLRLLFRRAPGKKRKVAEYYKKQERLLEGFNEMDSLVESGYFPGSLTEDEMERLAKNEQLAIHLSNVANVVLFLAKIYASIQSRSLAVIASTLDSLLDLLSGFILWFTAHAMKSPNHYHYPIGKNRMQPVGIIVFASVMATLGLQILLESGRDLVSKKGPEMNANQEKWMIGIMVGVTGVKLALMLYCRRFKNEIVKAYAQDHFFDVITNSVGLVTAVLAVRFYWWIDPTGAIIIALYTICTWARTVVENVWSLIGRTAPPDFLAKLTYLIWNHHEEIKHIDTVRAYTFGAQYFVEVDIVLPENMLLNQAHNIGETLQEKLEQLPDVERAFVHIDFEFTHRPEHKTKI*
FtMTP11	FtPinG0000993800.01	MAEQFKLDLNHDSSDERLLLTPESVSDNATCVADQSWRLNFDGFQLSAEHKEKPRKLHDCLGVLGSEDDVAEYYQQQVEMLEGFNEMDALAERGFMPGMSKEEQEKLAKSETFAIRISNVANMVLFAAKVYASIRSGSLAIIASTLDSLLDLLSGFILWFTAFSMSTPNPYQYPIGKKRMQPLGILVFASVMATLGLQIILESLRQLVSGEHGFSLSKDQEGWLVGIMLSVTVVKLLLVLYCRSFTNEIVKAYAQDHFFDVITNVIGLIAALLANSFSDWMDPVGAIILALYTIRTWSMTVLENVNSLVGRSATPDFLRKLTYLSWNHHKAIRHIDTVRAYTFGSHYFVEVDIVLPASMPLQEAHDIGESLQEKLEQLPEIERAFVHLDYEYSHKPEHA…
FtMTP12	FtPinG0003108700.01	MLFQSFVLAIVFLVRFQALRYCGTAGMILAEFSGNIAFQFLSRTSVDRDRNASSYKALRGSFFLVLGLLLLSLSWDRLECFPFSYLNHGKLSASMIISQKCVRIGPMLLPFLSGFLGCYERSLTNSPLIRHLGHTRIQLISLSLTTVLLFLPALVSFWIFEEEGGGLSMSNLSWPLANTVLFGVLLNEWYTHDKTYKDFLVTFAFTVGLELVYFPELSLWGLLICGLLFWITVRQLDDAYSNYVELGMESSDSASSLIMKPIRHIMSERKSRKIALFLMINTIYMFVEFVAGFMSNSLGLISDACHMLFDCAALAIGLYASYISRLPANGQYNYGRGRFEVLSGYANAVLLVLVGALIVLESFERILDPQEVSTNSLLIVSVGGLLVNVIGLVFFHEEH…
