# Supplementary material for: Metal Tolerance Protein Encoding Gene Family in Fagopyrum tartaricum: Genome-Wide Identification, Characterization and Expression under Multiple Metal Stresses
Source: Plants (Basel). 2022 Mar 23;11(7):850. doi: 10.3390/plants11070850 (PMC9003181; doi:10.3390/plants11070850)
Supplement: Supplementary file 1 [file plants-11-00850-s001.zip › Supplemental Table S3.xlsx]

## Sheet: Sheet1
Table S3 Optimal forward and reverse primers for qRT-PCR analysis
Gene name	Gene ID	primer	Sequence(5‘-3’)
FtMTP1	FtPinG0002597700.01.T01	F	CTCATATGGCTCCTCGCTGG
		R	CAAAGGCAGCAACGAGGAAC
FtMTP3.1	FtPinG0007468900.01.T01	F	TGACAGATGCAGCTCACCTC
		R	AACCGTAAGTTTGGCGTGGA
FtMTP3.2	FtPinG0004200900.01.T01	F	GGAGGAACCACCAAGCATCA
		R	GTTTCGTTTCCGGCTTTGCT
FtMTP5	FtPinG0009580000.01.T01	F	CTCCAAAGGGCATCTCCTGG
		R	CACCGCTCTGTCGTCTATCC
FtMTP6	FtPinG0006378700.01.T01	F	AAGCAGGGCTAGAATCTGGC
		R	CTCTCCTTCCCCTCAGTCGA
FtMTP7.1	FtPinG0000904200.01.T01	F	ATTCTCCACCTGCGACGATC
		R	TTCGTCGGGTGAAAAGCTGA
FtMTP7.2	FtPinG0008097000.01.T01	F	CAGCTGCTGAGGGAATGACA
		R	AGACCAGTAACTGCAGCACC
FtMTP8.1	FtPinG0006632200.01.T01	F	CTCCGAACTGGACTTGACCC
		R	CGGTCGACCTCGTCAAAAGA
FtMTP8.2	FtPinG0000879500.01.T01	F	TGGATTGACCCCATTGGAGC
		R	TTCTGCAGCATCTCAGGTGG
FtMTP9	FtPinG0000534400.01.T01	F	TGCATCGGTGATGGCTACTC
		R	CATTCTTGAAGCGGCGACAG
FtMTP11	FtPinG0000993800.01.T01	F	GGTTCTTTACTGCCGCTCCT
		R	CCAACAGGGTCCATCCAGTC
FtMTP12	FtPinG0003108700.01.T01	F	ATCGCTGCTCAGGAACTCTG
		R	ACATCCGTGTTCGTCAAGCT
FtH3		F	GAAATTCGCAAGTACCAGAAGAG
		R	CCAACAAGGTATGCCTCAGC
