# Supplementary figures and images for: Metal Tolerance Protein Encoding Gene Family in Fagopyrum tartaricum: Genome-Wide Identification, Characterization and Expression under Multiple Metal Stresses
Source: MDPI journal article supplement (doi:10.3390/plants11070850), 2022-03-23

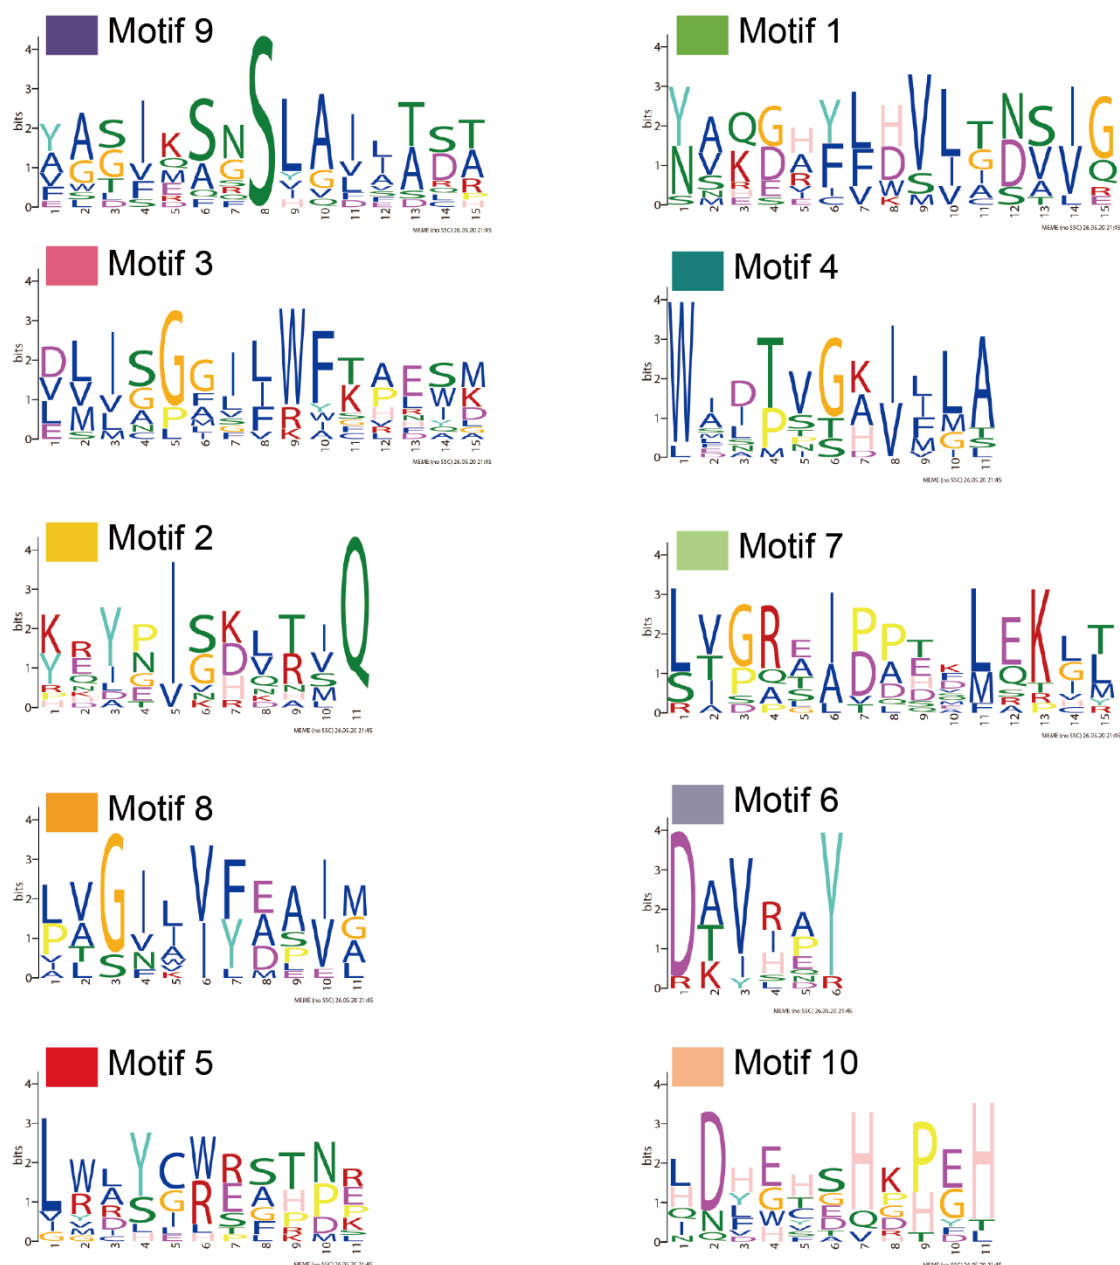

**Figure S1.** The detailed information about ten motifs of FtMTP proteins.

Supplement: s1 [file s1]
